# Supplementary material for: Morphology-dependent photocatalytic activity of octahedral anatase particles prepared by ultrasonication–hydrothermal reaction of titanates
Source: Royal Society of Chemistry journal article supplement (doi:10.1039/c5nr02386f), 2015-01-01
Supplement: c5nr02386f1.pdf [file c5nr02386f1.pdf]

Supporting information (SI) for

**Morphology-dependent photocatalytic activity of octahedral anatase particles prepared by ultrasonication–hydrothermal reaction of titanates**

Zhishun Wei,<sup>a</sup> Ewa Kowalska,<sup>\*a</sup> Jonathan Verrett,<sup>b</sup> Christophe Colbeau-Justin,<sup>b</sup> Hynd Remita<sup>b,c</sup> and Bunsho Ohtani<sup>a</sup>

<sup>a</sup>*Catalysis Research Center, Hokkaido University, Sapporo 001-0021, Japan.*

*e-mail: kowalska@cat.hokudai.ac.jp; tel.: +81-11-706-9130; fax: +81-11-706-9133.*

<sup>b</sup>*Laboratory of Physical Chemistry, UMR 8000, Paris-Sud University, 91405 Orsay, France.*

<sup>c</sup>*CNRS, Laboratory of Physical Chemistry, UMR 8000, 91405 Orsay, France*

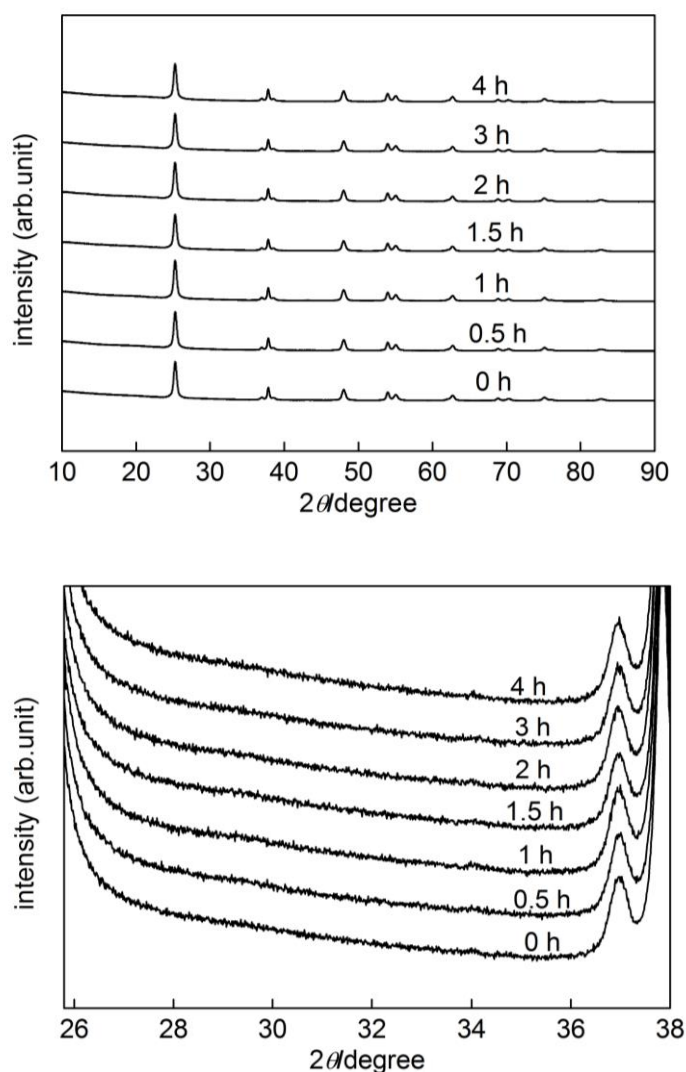

**Fig. S1** XRD patterns of products obtained for various US durations. (top) Whole XRD range for all samples. (bottom) Enlargement of XRD patterns for {310} TNWs range.

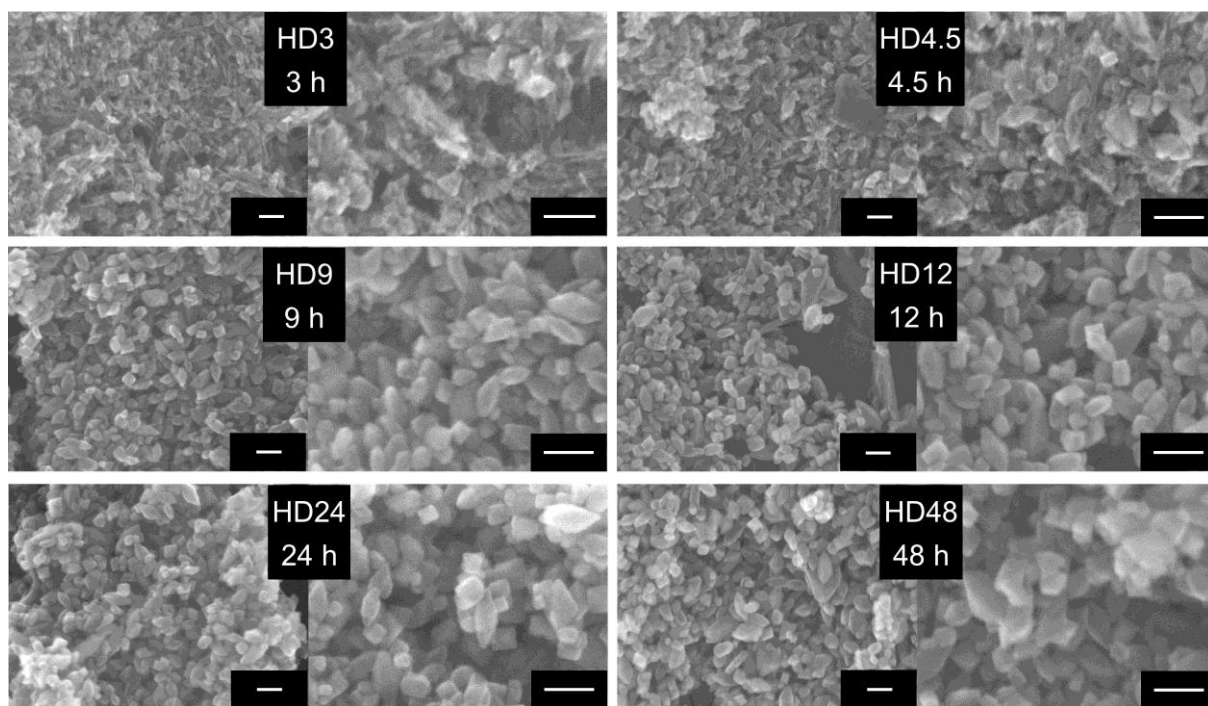

**Fig. S2** SEM images of products obtained at different HT durations (3–48 h). Scale bars correspond to 50 nm.

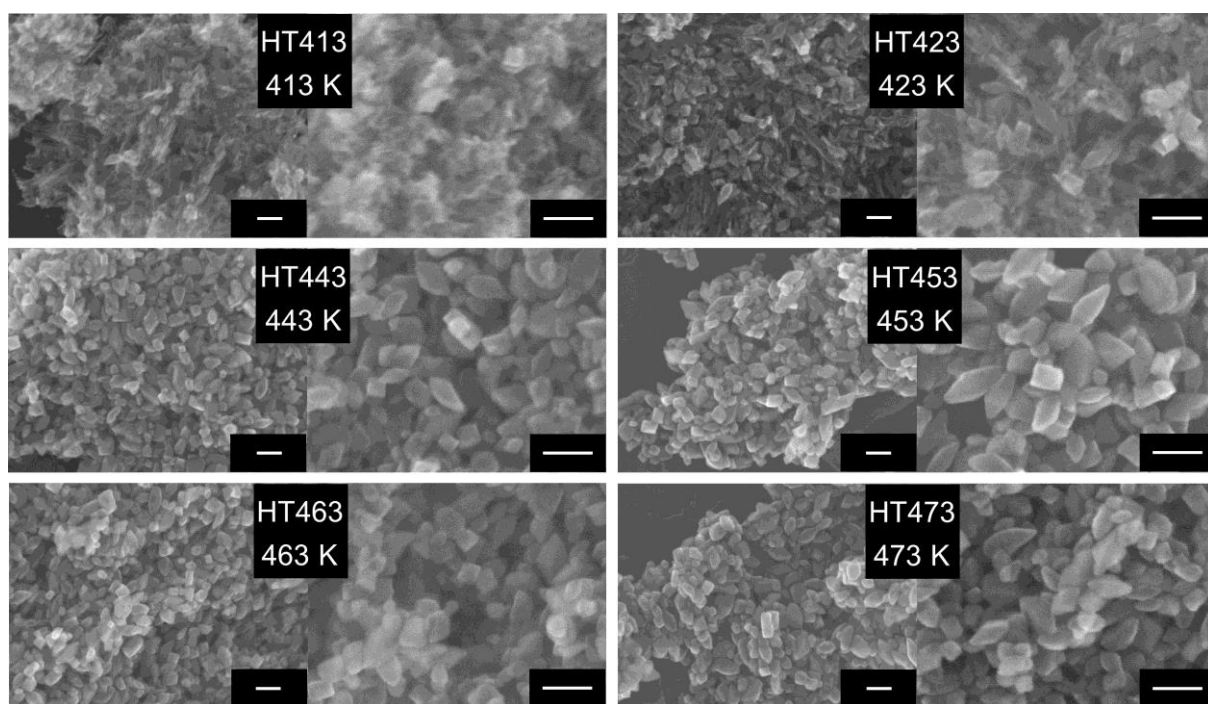

**Fig. S3** SEM images of products obtained at different HT temperatures (413–473 K). Scale bars correspond to 50 nm.

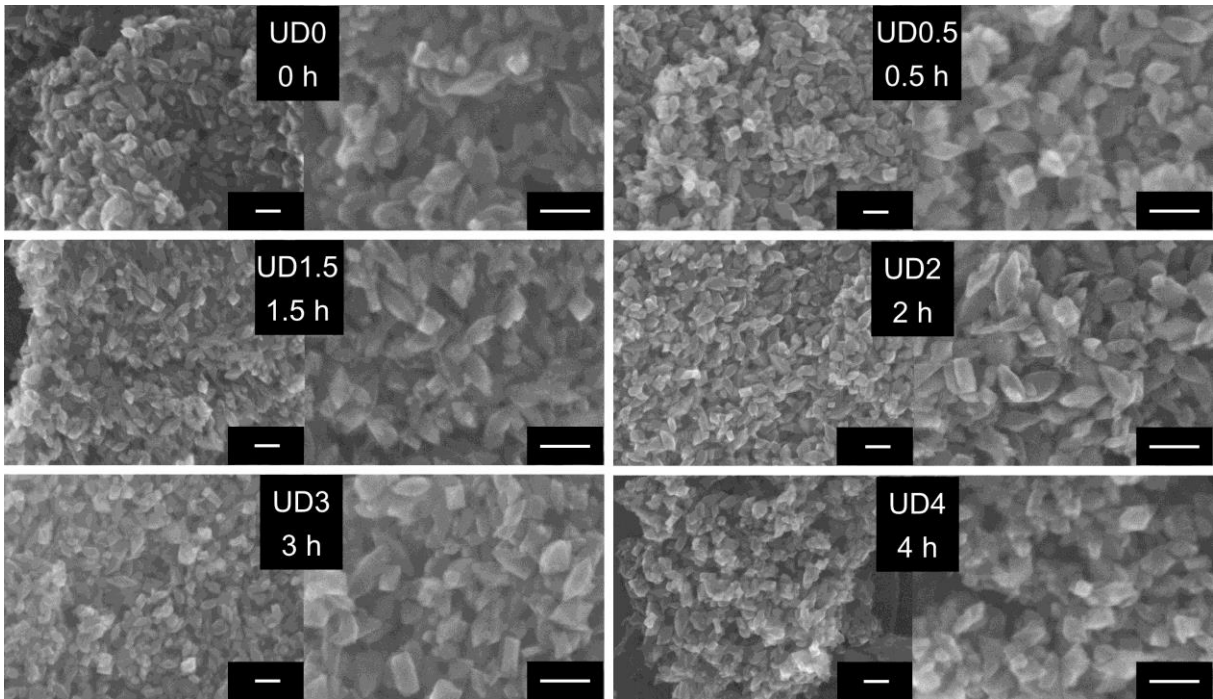

**Fig. S4** SEM images of products obtained for different US durations (0–4 h). Scale bars correspond to 50 nm.

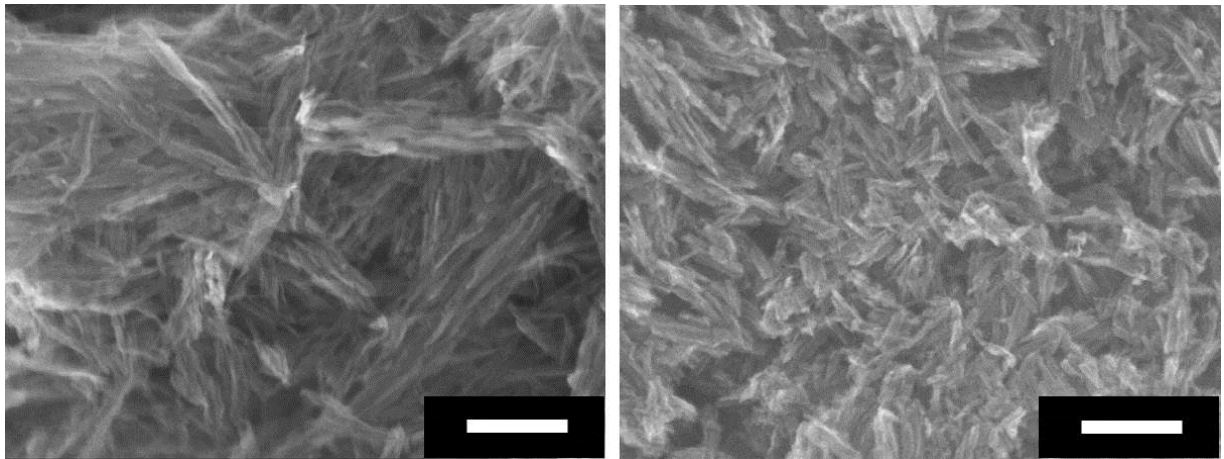

**Fig. S5** SEM images of: (left) TNWs, (right) TNWs after 1-h US process. Scale bars correspond to 100 nm.

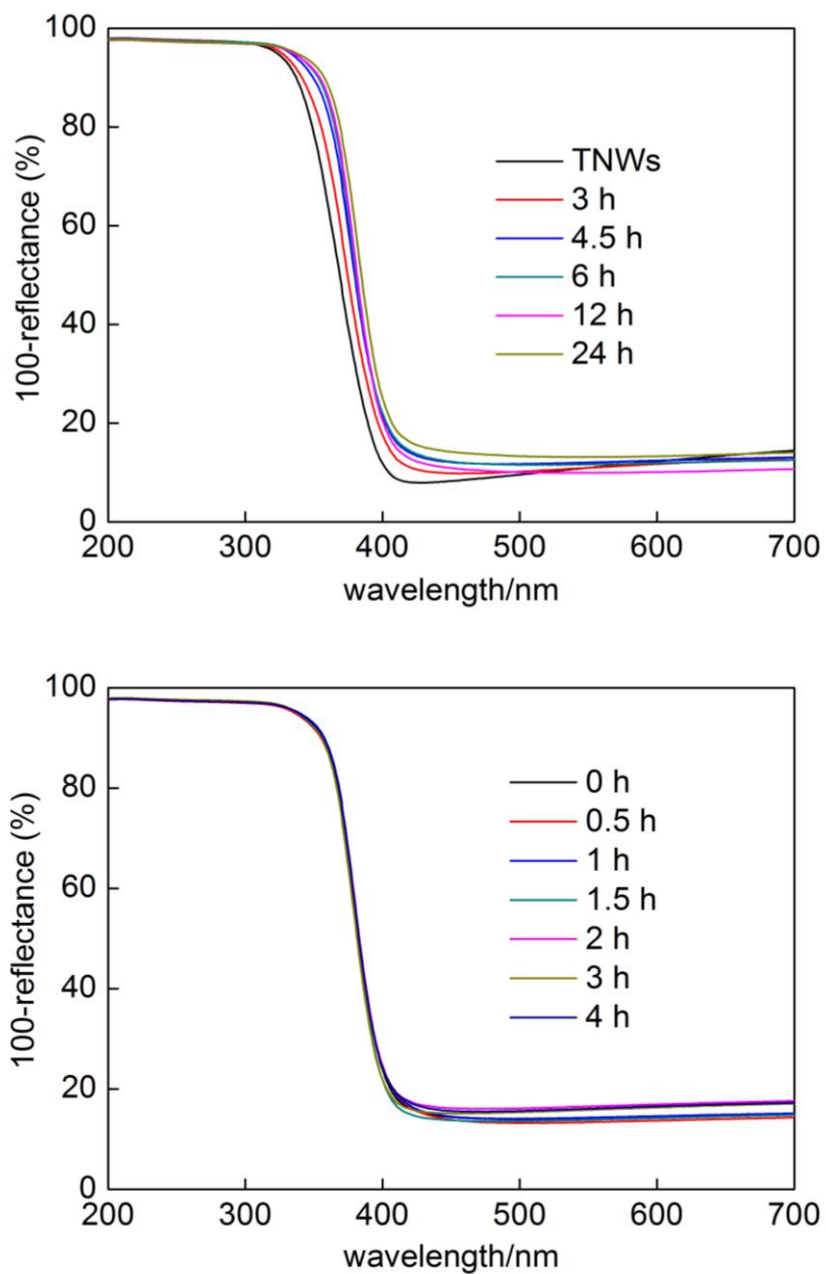

**Fig. S6** DRS of: (top) TNWs and products obtained at different HT durations (3–24 h), (bottom) products obtained for different US durations (0–4 h).
